# Supplementary material for: Chimeric Flaviviral RNA−siRNA Molecules Resist Degradation by The Exoribonuclease Xrn1 and Trigger Gene Silencing in Mammalian Cells
Source: PubMed Central journal article supplement (PMC8596575; doi:10.1002/cbic.202100434), 2021-09-12
Supplement: CBIC-22-3099-s001.pdf [file CBIC-22-3099-s001.pdf]

# ChemBioChem

Supporting Information

## **Chimeric Flaviviral RNA–siRNA Molecules Resist Degradation by The Exoribonuclease Xrn1 and Trigger Gene Silencing in Mammalian Cells**

Cressida Harvey, Sven Klassa, Esteban Finol, Jonathan Hall, and Alyssa C. Hill\*

**Table S1.** Sequences of xrRNA constructs. Constructs with stem-loop deletions are denoted by  $\Delta P4-L4$ . WT, wild type; DENV, Dengue virus; MECDV, Mercadeo virus; SLEV, Saint Louis encephalitis virus; ZIKV, Zika virus; TABV, Tamana bat virus; GBVB, GB virus B; APPV, atypical porcine pestivirus; SPgV, simian pegivirus.

| Entry                | Sequence (5' to 3')                                          | Accession number | Range       |
|----------------------|--------------------------------------------------------------|------------------|-------------|
| DENV $\Delta P4-L4$  | AGUCAGGCCGGAAUUAAGCCAUAGUACGGUAAGAGCUAUGCUGCCUGUGAGCCC       | MT447147         | 10324-10376 |
| MECDV $\Delta P4-L4$ | AGUCAGACCGAAAAGCCACUCAUUGGUUGUAAAAGAGUGCUGUCUGUGACAAC        | NC_027819        | 10594-10642 |
| SLEV $\Delta P4-L4$  | AGUCAGGCCAAUCAGUUUUGCCACCGGAUGUCAGGUAAAACGGUGCUGUCUGUAACCGGC | NC_007580.2      | 10430-10489 |
| ZIKV $\Delta P4-L4$  | AGUCAGGCCGAUAACGCCAUGGCACGGAAAAAGCCAUGCUGCCUGUGAGCC          | MF510857.1       | 10476-10526 |
| TABV WT              | GGCAAGGUACGGAUUAGCCGUAGGGGCUUGAGAACCCCCCUCCCCACUC            | AF346759         | 10226-10275 |
| GBVB WT              | GGCAACAGGGGAGACCCCGGGCUUAACGACCCCGCCGAUGUGAGUU               | NC_001655.1      | 9099-9144   |
| APPV WT              | GGGCAAGUGCCCGUAUAGGCUGGGGCGAUCGCCGUACCCCCCUUUACCAGGCG        | NC_038964.1      | 11108-11161 |
| SPgV WT              | GGCAGCAGCAGACGCAAGUCUGGGGGAAACGAUCGCUCUCCUCCUCUGCAGAUC       | U94421.1         | 9446-9498   |

**Table S2.** Masses calculated and found for xrRNA constructs.

| Entry                | Mass calculated (g/mol) | Mass found (g/mol) |
|----------------------|-------------------------|--------------------|
| DENV $\Delta P4-L4$  | 17076.3                 | 17076.45           |
| MECDV $\Delta P4-L4$ | 16747.2                 | 16746.62           |
| SLEV $\Delta P4-L4$  | 19256.6                 | 19255.83           |
| ZIKV $\Delta P4-L4$  | 16446.0                 | 16445.91           |
| TABV WT              | 16005.7                 | 16004.91           |
| GBVB WT              | 14863.0                 | 14862.11           |
| APPV WT              | 17379.5                 | 17378.38           |
| SPgV WT              | 17049.3                 | 17048.22           |

**Table S3.** Sequences of xrRNA-siRNA constructs and controls. Adapters are bold. Antisense sequences are underlined. siREN, Renilla luciferase-targeting siRNA; siRND, non-targeting control siRNA; S1, strand 1; S2, strand 2; AS, antisense strand; SS, sense strand; **5' EXT, 5' extended**; X, randomized nucleotide position.

| Entry                                               | Sequence (5' to 3')                                                     |
|-----------------------------------------------------|-------------------------------------------------------------------------|
| DENV $\Delta$ P4-L4-siREN S1                        | AGUCAGGCC <b>AA</b> GAGCGAAGAGGGCGAGAAUU                                |
| <b>DENV<math>\Delta</math>P4-L4-siREN S1 5' EXT</b> | <b>AAAGGAAAAUAAAAAUCAAACAAGGCAAGAAGUCAGGCCAAAGAGCGAAGAGGGCGAGAAUU</b>   |
| DENV $\Delta$ P4-L4-siREN S2                        | <u>UUUCUCGCCCUCUUCGCUCUUGCCAUAGUACGGUAAGAGCUAUGCUGCCUGUGAGCCC</u> s     |
| DENV $\Delta$ P4-L4-siRND S1                        | AGUCAGGCC <b>AA</b> GUGXXUAAXXAACXCAXACUU                               |
| DENV $\Delta$ P4-L4-siRND S2                        | <u>GUXUGXGUUXXUUAXXCACUUGCCAUAGUACGGUAAGAGCUAUGCUGCCUGUGAGCCC</u>       |
| MECDV $\Delta$ P4-L4-siREN S1                       | AGUCAGACC <b>AA</b> GAGCGAAGAGGGCGAGAAUU                                |
| MECDV $\Delta$ P4-L4-siREN S2                       | <u>UUUCUCGCCCUCUUCGCUCUUGCCACUCAAUUGGUUGUAAAGAGUGCUGUCUGUGACAAC</u>     |
| MECDV $\Delta$ P4-L4-siRND S1                       | AGUCAGACC <b>AA</b> GUGXXUAAXXAACXCAXACUU                               |
| MECDV $\Delta$ P4-L4-siRND S2                       | <u>GUXUGXGUUXXUUAXXCACUUGCCACUCAAUUGGUUGUAAAGAGUGCUGUCUGUGACAAC</u>     |
| SLEV $\Delta$ P4-L4-siREN S1                        | AGUCAGGCC <b>AAA</b> AAGAGCGAAGAGGGCGAGAAUU                             |
| SLEV $\Delta$ P4-L4-siREN S2                        | <u>UUUCUCGCCCUCUUCGCUCUUUUGCCACCGGAUGUCAGGUAAACGGUGCUGUCUGUAACCUGCC</u> |
| SLEV $\Delta$ P4-L4-siRND S1                        | AGUCAGGCC <b>AAA</b> AAGUGXXUAAXXAACXCAXACUU                            |
| SLEV $\Delta$ P4-L4-siRND S2                        | <u>GUXUGXGUUXXUUAXXCACUUUUGCCACCGGAUGUCAGGUAAACGGUGCUGUCUGUAACCUGCC</u> |
| ZIKV $\Delta$ P4-L4-siREN S1                        | AGUCAGGCC <b>GA</b> AAGAGCGAAGAGGGCGAGAAUU                              |
| ZIKV $\Delta$ P4-L4-siREN S2                        | <u>UUUCUCGCCCUCUUCGCUCUUCGCCAUUGGCACGGAAAAAGCCAUGCUGCCUGUGAGCC</u>      |
| ZIKV $\Delta$ P4-L4-siRND S1                        | AGUCAGGCC <b>GA</b> AAGUGXXUAAXXAACXCAXACUU                             |
| ZIKV $\Delta$ P4-L4-siRND S2                        | <u>GUXUGXGUUXXUUAXXCACUUCGCCAUUGGCACGGAAAAAGCCAUGCUGCCUGUGAGCC</u>      |
| siREN AS                                            | <u>UUUCUCGCCCUCUUCGCUCUU</u>                                            |
| siREN SS                                            | GAGCGAAGAGGGCGAGAAUU                                                    |
| siRND AS                                            | <u>GUXUGXGUUXXUUAXXCACUU</u>                                            |
| siRND SS                                            | GUGXXUAAXXAACXCAXACUU                                                   |

**Table S4.** Masses calculated and found for xrRNA-siRNA constructs and controls. For oligoribonucleotides synthesized with randomized nucleotide positions, the measured masses fall within the expected range, *i.e.*, between the mass of an oligoribonucleotide with G nucleotides at all random positions and the mass of an oligoribonucleotide with C nucleotides at all random positions.

| Entry                                               | Mass calculated (g/mol) | Mass found (g/mol) |
|-----------------------------------------------------|-------------------------|--------------------|
| DENV $\Delta$ P4-L4-siREN S1                        | 10475.5                 | 10474.64           |
| <b>DENV<math>\Delta</math>P4-L4-siREN S1 5' EXT</b> | <b>20642.8</b>          | <b>20641.30</b>    |
| DENV $\Delta$ P4-L4-siREN S2                        | 18368.9                 | 18369.20           |
| MECDV $\Delta$ P4-L4-siREN S1                       | 10459.5                 | 10458.57           |
| MECDV $\Delta$ P4-L4-siREN S2                       | 18684.1                 | 18683.92           |
| SLEV $\Delta$ P4-L4-siREN S1                        | 11133.9                 | 11132.9            |
| SLEV $\Delta$ P4-L4-siREN S2                        | 20283.0                 | 20286.57           |
| ZIKV $\Delta$ P4-L4-siREN S1                        | 10820.7                 | 10819.81           |
| ZIKV $\Delta$ P4-L4-siREN S2                        | 18390.0                 | 18390.14           |
| siREN AS                                            | 6436.8                  | 6436.09            |
| siREN SS                                            | 6901.3                  | 6900.39            |

**Table S5.** Sequences of xrRNA-siRNA constructs. Adapters are bold. Antisense sequences are underlined.

| Entry          | Sequence (5' to 3')                                                                 |
|----------------|-------------------------------------------------------------------------------------|
| DENV-siREN S1  | AGUCAGGCC <b>AAG</b> AGCGAAGAGGGCGAGAAAUU                                           |
| DENV-siREN S2  | <u>UUUCUCGCCCUCUUCGCUCUUGCCAUAGUACGGUAAGAGCUAUGCUGCCUGUGAGCCCCGUCUAAGGACGU</u>      |
| MECDV-siREN S1 | AGUCAGACC <b>AAG</b> AGCGAAGAGGGCGAGAAAUU                                           |
| MECDV-siREN S2 | <u>UUUCUCGCCCUCUUCGCUCUUGCCACUCAUUGGUUGUAAAGAGUGCUGUCUGUGACAACCCAAUAGUCGAUGGA</u>   |
| ZIKV-siREN S1  | AGUCAGGCC <b>AA</b> AGCGAAGAGGGCGAGAAAUU                                            |
| ZIKV-siREN S2  | <u>UUUCUCGCCCUCUUCGCUCUUGCCCAUGGCACGGAAAAAGCCAUGCUGCCUGUGAGCCCCUCAGAGGACACUGAGU</u> |

**Table S6.** Sequences of mutant MECDV-siREN constructs with stem-loop P4-L4 re-installed. Mutation sites are underlined. MUT, mutant.

| Entry                          | Sequence (5' to 3')                                                                          |
|--------------------------------|----------------------------------------------------------------------------------------------|
| MECDV-siREN S2 <sub>MUT1</sub> | UUUCUCGCCCUCUUCGCUCUUGCCACUCAUUGGGGGGAAAGAGUGCUGUCUGUG <u>CCCCCCCC</u> AAUAGUCGAUGGA         |
| MECDV-siREN S2 <sub>MUT2</sub> | UUUCUCGCCCUCUUCGCUCUUGCCACUCAUUG <u>CCCC</u> AAAGAGUGCUGUCUGUGGGGGG <u>CC</u> AAUAGUCGAUGGA  |
| MECDV-siREN S2 <sub>MUT3</sub> | UUUCUCGCCCUCUUCGCUCUUGCCACUCAUUGGC <u>CG</u> AAAGAGUGCUGUCUGUG <u>CGCG</u> CCCCAAUAGUCGAUGGA |

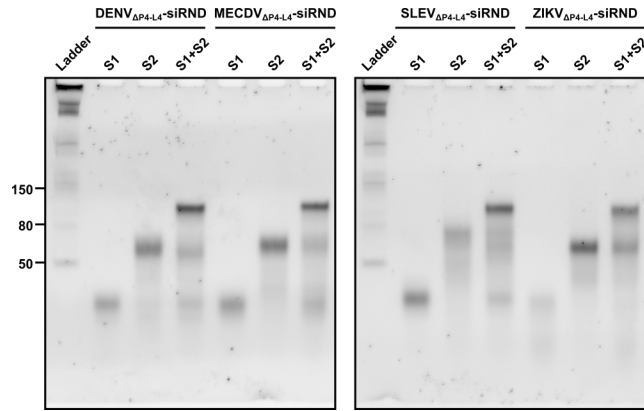

**Figure S1.** Non-denaturing polyacrylamide gel mobilities of control xrRNA<sub>ΔP4-L4</sub>-siRNA constructs. Reference bands in the ladder are single-stranded RNA.

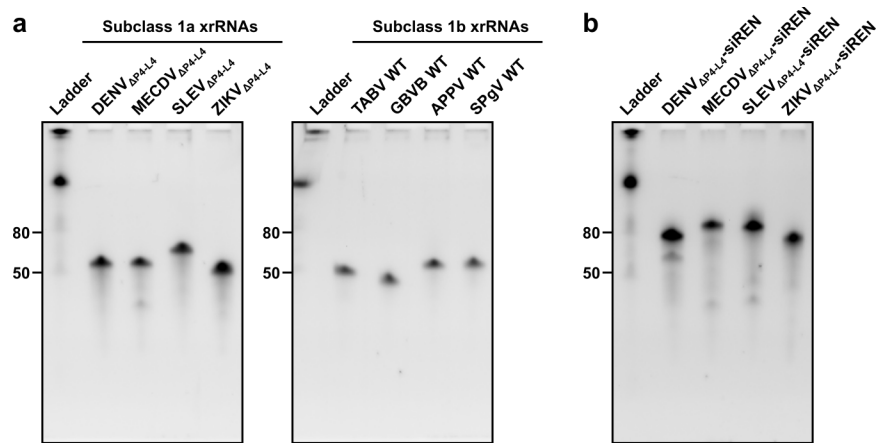

**Figure S2.** (a) Denaturing polyacrylamide gel mobilities of xrRNA constructs. (b) Denaturing polyacrylamide gel mobilities of xrRNA<sub>ΔP4-L4</sub>-siRNA constructs. Reference bands in the ladder are single-stranded RNA.

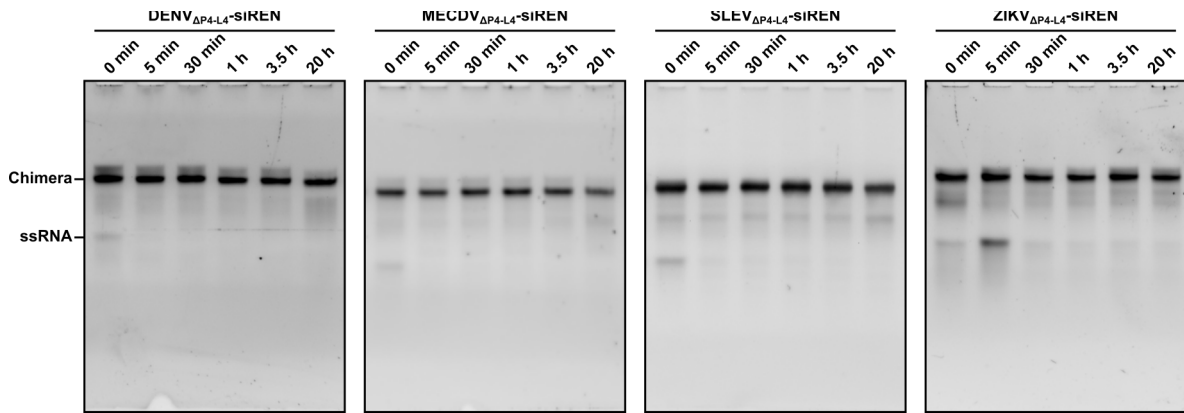

**Figure S3.** Non-denaturing polyacrylamide gel mobilities of  $xrRNA_{\Delta P4-L4}$ -siRNA constructs with a two-fold molar excess of S1 to S2 following incubation with Xrn1 at 37°C. The excess S1 is labelled as a single-stranded RNA (ssRNA). The length of incubation with Xrn1 is indicated above each lane.

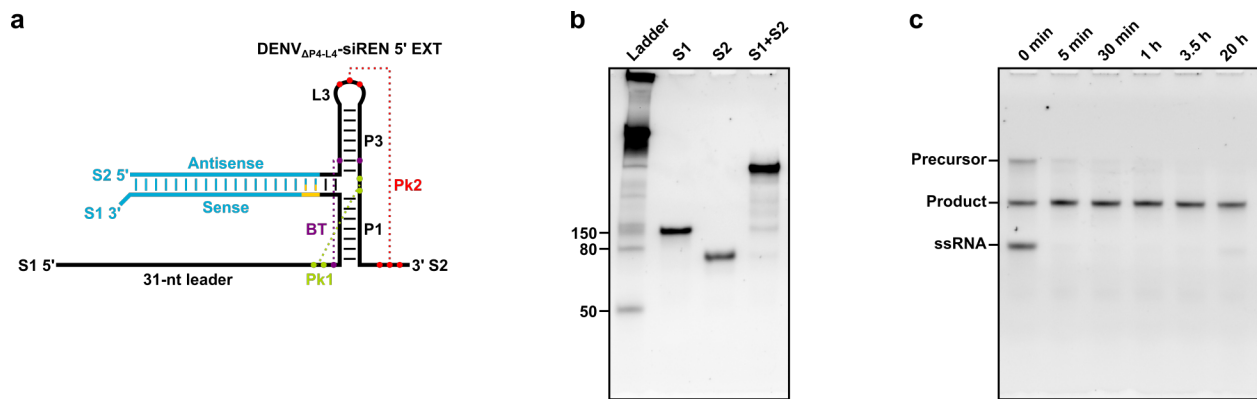

**Figure S4.** (a)  $DENV_{\Delta P4-L4}$ -siREN 5' extended (5' EXT) construct. A 31-nucleotide (nt), unstructured "leader" sequence at the 5' end of S1 is labelled. (b) Non-denaturing polyacrylamide gel mobility of the  $DENV_{\Delta P4-L4}$ -siREN 5' EXT construct. Reference bands in the ladder are single-stranded RNA. (c) Non-denaturing polyacrylamide gel mobility of the  $DENV_{\Delta P4-L4}$ -siREN 5' EXT construct with a two-fold molar excess of S2 to S1 following incubation with Xrn1 at 37°C. The excess S2 is labelled as a single-stranded RNA (ssRNA). The length of incubation with Xrn1 is indicated above each lane.

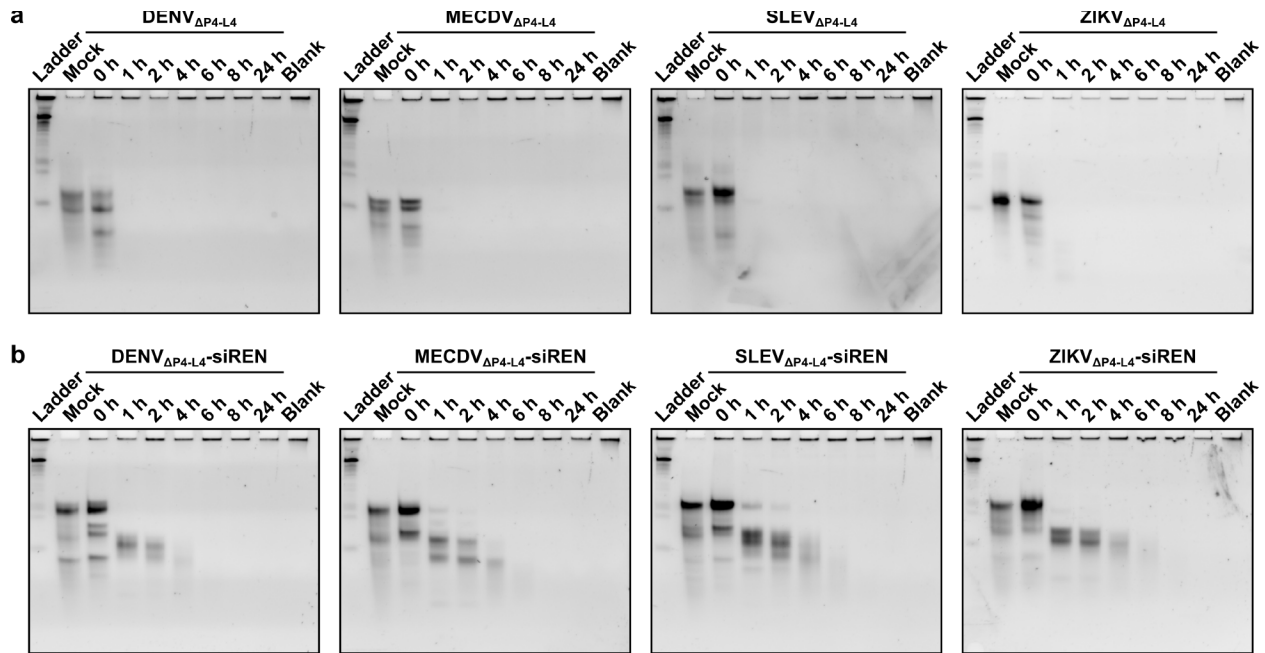

**Figure S5.** (a) Serum stability assays of xrRNA $\Delta$ P4-L4 constructs in a second batch of mouse serum. (b) Serum stability assays of xrRNA $\Delta$ P4-L4-siRNA constructs in a second batch of mouse serum. The length of incubation in 50% mouse serum is indicated above each lane. Mock is RNA incubated in water at 37°C for 24 h. Blank is 50% mouse serum incubated at 37°C for 24 h. Reference bands in the ladder are single-stranded RNA.

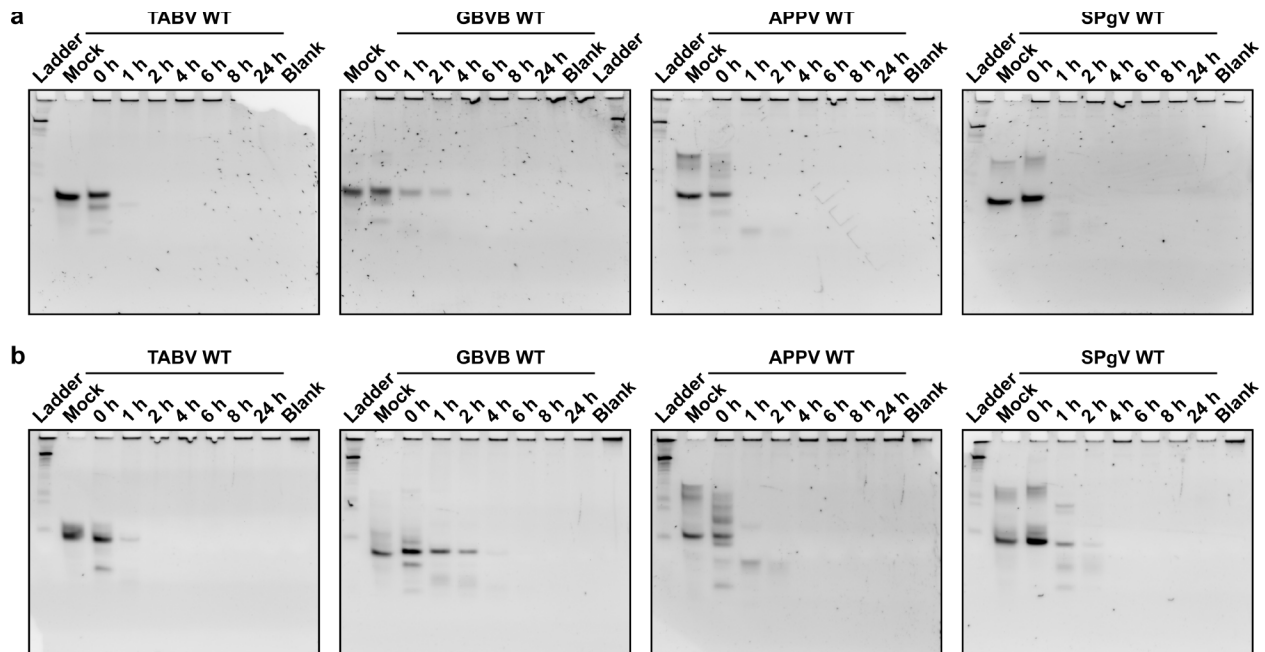

**Figure S6.** (a) Serum stability assays of xrRNA constructs. (b) Serum stability assays of the same constructs in a second batch of mouse serum. The length of incubation in 50% mouse serum is indicated above each lane. Mock is RNA incubated in water at 37°C for 24 h. Blank is 50% mouse serum incubated at 37°C for 24 h. Reference bands in the ladder are single-stranded RNA.

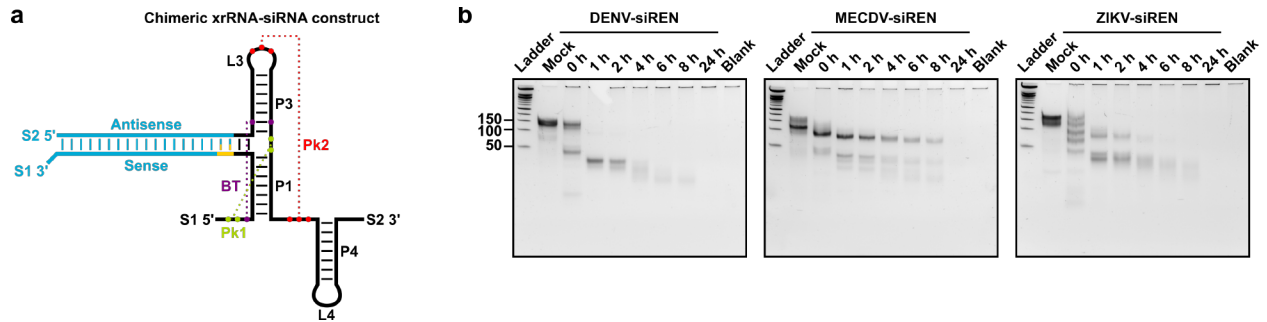

**Figure S7.** (a) Chimeric xrRNA-siRNA construct. (b) Serum stability assays for xrRNA-siRNA constructs annealed in 1 M NaCl, 10 mM cacodylic acid, pH 7.0. The length of incubation in 50% mouse serum at 37°C is indicated above each lane. Mock is RNA incubated in water at 37°C for 24 h. Blank is 50% mouse serum incubated at 37°C for 24 h. The reference bands in the ladder are double-stranded DNA. Each gel image is representative of three independent replicates.

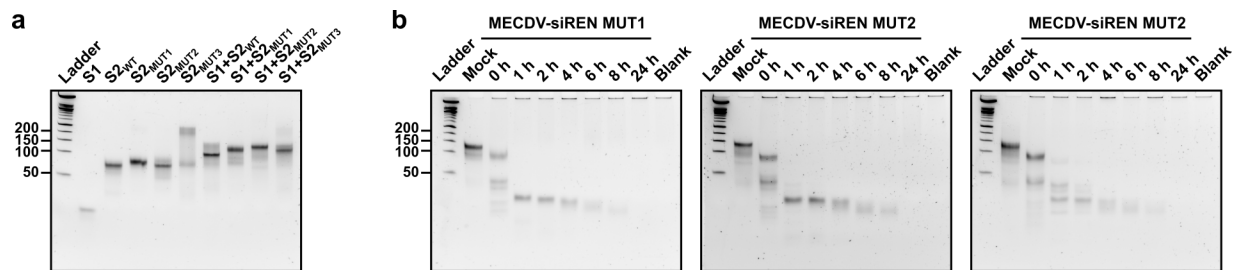

**Figure S8.** (a) Non-denaturing polyacrylamide gel mobilities of mutant MECDV-siREN constructs. (b) Serum stability assays for mutant MECDV-siREN constructs annealed in 1 M NaCl, 10 mM cacodylic acid, pH 7.0. The length of incubation in 50% mouse serum at 37°C is indicated above each lane. Mock is RNA incubated in water at 37°C for 24 h. Blank is 50% mouse serum incubated at 37°C for 24 h. In (a) and (b), the reference bands in the ladder are double-stranded DNA.
